# Supplementary material for: Mortality trends in women and men with COPD in Ontario, Canada, 1996–2012
Source: HighWire-hosted journal article supplement (doi:10.1136/thoraxjnl-2014-205956), 2014-11-26
Supplement: thoraxjnl-2014-205956supp.pdf [file thoraxjnl-2014-205956supp.pdf]

**eTable 1.** International Classification of Disease codes used to identify cause of death from 1996 to 2009.

| <b>Disease</b>         | <b>ICD-10</b>                                                                                                                                                                                                                                                                                                                                                                                                                                                                                                                                                                                                                                                                                                                                                                                                                                                                                                                                                                                                                                                                                                                                                                                                                                                  | <b>ICD-9</b>                                                                                                                                                                                                                                                                                                                                                                                                                                                                                                                                                                                                                                                                                                                                                                                                                                          |
|------------------------|----------------------------------------------------------------------------------------------------------------------------------------------------------------------------------------------------------------------------------------------------------------------------------------------------------------------------------------------------------------------------------------------------------------------------------------------------------------------------------------------------------------------------------------------------------------------------------------------------------------------------------------------------------------------------------------------------------------------------------------------------------------------------------------------------------------------------------------------------------------------------------------------------------------------------------------------------------------------------------------------------------------------------------------------------------------------------------------------------------------------------------------------------------------------------------------------------------------------------------------------------------------|-------------------------------------------------------------------------------------------------------------------------------------------------------------------------------------------------------------------------------------------------------------------------------------------------------------------------------------------------------------------------------------------------------------------------------------------------------------------------------------------------------------------------------------------------------------------------------------------------------------------------------------------------------------------------------------------------------------------------------------------------------------------------------------------------------------------------------------------------------|
| COPD                   | <b>J41</b> Simple and mucopurulent chronic bronchitis<br><b>J42</b> Chronic bronchitis<br><b>J43</b> Emphysema<br><b>J44</b> Chronic airway obstruction Not Elsewhere Classified                                                                                                                                                                                                                                                                                                                                                                                                                                                                                                                                                                                                                                                                                                                                                                                                                                                                                                                                                                                                                                                                               | <b>491</b> Bronchitis<br><b>492</b> Emphysema<br><b>496</b> Chronic airway obstruction not elsewhere classified                                                                                                                                                                                                                                                                                                                                                                                                                                                                                                                                                                                                                                                                                                                                       |
| Cardiovascular Disease | <b>I20</b> Angina pectoris<br><b>I24</b> other acute ischaemic heart conditions<br><b>I251</b> Atherosclerotic heart disease<br><b>I258</b> Other forms of chronic ischaemic heart disease<br><b>I259</b> Chronic ischaemic heart disease, unspecified<br><br><b>I50</b> Heart failure<br><b>J81</b> Pulmonary edema<br><b>G45</b> Transient cerebral ischaemic attacks and related syndromes<br><b>G46</b> Vascular syndromes of brain in cerebrovascular disease<br><b>I63</b> Cerebral infarction<br><b>I64</b> Stroke, not specified as haemorrhage or infarction<br><b>I47</b> Paroxysmal tachycardia<br><b>I48</b> Atrial fibrillation and flutter<br><b>I49</b> Other cardiac arrhythmias<br><b>I21</b> Acute myocardial infarction<br><b>I22</b> Subsequent myocardial infarction (this category should be assigned for infarction of any myocardial site, occurring within 4 weeks (28 days) from onset of a previous infarction)<br><b>I252</b> Old myocardial infarction: Healed myocardial infarction. Past myocardial infarction diagnosed by ECG or other special investigation, but currently presenting no symptoms.<br><b>I254</b> Coronary artery aneurysm<br><b>I255</b> Ischaemic cardiomyopathy<br><b>I256</b> Silent myocardial ischemia | <b>411</b> Post myocardial infarction syndrome, intermediate coronary syndrome, coronary occlusion without MI included<br><b>413</b> Angina<br><b>414</b> Coronary atherosclerosis, aneurysm – heart wall, coronary vessel aneurysm, aneurysm of heart not elsewhere classified, chronic ischemic heart disease no evidence of disease and not otherwise specified<br><br><b>428</b> Heart failure<br><b>5184, 514</b> Pulmonary edema<br><b>433</b> Artery occlusion<br><b>434</b> Cerebral thrombosis, embolism, or artery occlusion<br><b>435</b> Artery syndrome<br><b>436</b> Cerebral vascular accident<br><br><b>427</b> except <b>427.6</b> atrial flutter, ventricular fibrillation, cardiac arrest, paroxysmal tachycardia, etc (but not premature beats)<br><b>410</b> Acute myocardial infarction<br><b>412</b> Old myocardial infarction |
| Lung cancer            | <b>C340-C349</b> Cancer of bronchus and lung<br><b>C384</b> Cancer of the pleura<br><b>C450</b> Mesothelioma of the pleura                                                                                                                                                                                                                                                                                                                                                                                                                                                                                                                                                                                                                                                                                                                                                                                                                                                                                                                                                                                                                                                                                                                                     | <b>1622</b> Neoplasm of bronchus<br><b>1623-1625</b> Neoplasm of lung<br><b>1628-1629</b> Neoplasm of bronchus or lung not elsewhere classified and not otherwise specified                                                                                                                                                                                                                                                                                                                                                                                                                                                                                                                                                                                                                                                                           |

| <b>Disease</b> | <b>ICD-10</b> | <b>ICD-9</b>                  |
|----------------|---------------|-------------------------------|
|                |               | <b>163</b> Neoplasm of pleura |
